# Supplementary material
Source: ML conference proceedings conference paper supplement (https://openaccess.thecvf.com/content/CVPR_2020/html/Mahapatra_Pathological_Retinal_Region_CVPR_2020_paper.html)
Supplement: Supplementary file 1 [file Mahapatra_Pathological_Retinal_Region_CVPR_2020_supplemental.pdf]

# Pathological Retinal Region Segmentation From OCT Images Using Geometric Relation Based Augmentation

## 1. Supplementary Material

We assume that the segmentations  $s'_x$  of image  $x$  are generated from  $L$  levels of latent variables  $z_l$ . Denoting the generated mask as  $s$  for simplicity, we obtain conditional distribution  $p(s|x)$  for  $L$  latent levels as:

$$p(s|x) = \int p(s|z_1, \dots, z_L) p(z_1|z_2, x) \cdots p(z_{L-1}|z_L, x) p(z_L|x) dz_1, \dots, dz_L. \quad (1)$$

The posterior distribution of  $p(z|s, x)$  is approximated using a variational approximation  $q(z|s, x)$  where  $z = \{z_1, \dots, z_L\}$ .  $\log p(s|x) = L(s|x) + KL(q(z|s, x)||p(z|s, x))$ , where  $L$  is the evidence lower bound, and  $KL(\cdot, \cdot)$  is the Kullback-Leibler divergence.

Since  $KL(\cdot, \cdot) \geq 0$ ,  $L$  is a lower bound on the conditional log probability when the approximation  $q$  matches the posterior exactly. Using the decomposition in Eq.1,

$$\begin{aligned} \mathcal{L} = & \mathbb{E}_{q(z_1, \dots, z_L|x, s)} [\log p(s|z_1, \dots, z_L)] - \\ & \alpha_L KL[q(z_L|s, x)||p(z_L|x)] - \\ & \sum_{l=1}^{L-1} \alpha_l \mathbb{E}_{q(z_{l+1}|s, x)} [KL[q(z_l|z_{l+1}, s, x)||p(z_l|z_{l+1}, x)]] \end{aligned} \quad (2)$$

with  $\alpha_l = 1$ . Following standard practice we parameterize the prior and posterior distributions as axis aligned normal distributions  $\mathcal{N}(z|\mu, \sigma)$ . Specifically, we define

$$p(z_l|z_{l+1}, x) = \mathcal{N}\left(\mathbf{z}|\phi_l^{(\mu)}(z_l|z_{l+1}, x), \phi_l^{(\sigma)}(z_l|z_{l+1}, x)\right) \quad (3)$$

$$q(z_l|z_{l+1}, x, s) = \mathcal{N}\left(\mathbf{z}|\theta_l^{(\mu)}(z_l|z_{l+1}, s, x), \theta_l^{(\sigma)}(z_l|z_{l+1}, s, x)\right) \quad (4)$$

### 1.1. Derivation of Evidence Lower Bound

The complete derivation for Equation 2 is given below: Defining  $z = z_1, \dots, z_L$  we write :

$$\log p(s|x) = \mathcal{L}(s|x) + KL(q(z|s, x)||p(z|s, x)) \quad (5)$$

with

$$\mathcal{L}(s|x) = \mathbb{E}_{q(z|s, x)} [p(s|z, x)] - KL[q(z|s, x)||p(z|s, x)] \quad (6)$$

Since  $KL[q(z|s, x)||p(z|s, x)]$  is always positive  $\mathcal{L}(s|x)$  is a lower bound on  $\log p(s|x)$  with equality when  $q(z|s, x) = p(z|s, x)$ .

The KL-divergence term in Eq. 6 can be written as

$$\begin{aligned} & KL[q(z_1, \dots, z_L|s, x)||p(z_1, \dots, z_L|s, x)] \\ & = KL[q(z_L|s, x)q(z_1, \dots, z_{L-1}|z_L, s, x)||p(z_L|x)p(z_1, \dots, z_{L-1}|z_L, x)] \\ & = KL[q(z_L|s, x)||p(z_L|x)] + \\ & \int \cdots \int q(z_1, \dots, z_L|s, x) \log \frac{q(z_1, \dots, z_{L-1}|z_L, s, x)}{p(z_1, \dots, z_{L-1}|z_L, x)} dz_1, \dots, dz_L, \end{aligned} \quad (7)$$

Decomposing the right most term, we finally get

$$\begin{aligned} & \int_{z_L} \cdots \int_{z_1} q(z_1, \dots, z_L|s, x) \log \frac{q(z_1, \dots, z_{L-1}|z_L, s, x)}{p(z_1, \dots, z_{L-1}|z_L, x)} dz_1, \dots, dz_L, \\ & = \int_{z_L} \cdots \int_{z_1} q(z_1, \dots, z_L|s, x) \log \frac{\prod_{l=1}^{L-1} q(z_l|z_{l+1}, s, x)}{\prod_{l=1}^{L-1} p(z_l|z_{l+1}, x)} dz_1, \dots, dz_L, \\ & = \int_{z_L} \cdots \int_{z_1} q(z_1, \dots, z_L|s, x) \left[ \sum_{l=1}^{L-1} \log \frac{q(z_l|z_{l+1}, s, x)}{p(z_l|z_{l+1}, x)} \right] dz_1, \dots, dz_L, \\ & = \sum_{l=1}^{L-1} \int_{z_{l+1}} q(z_{l+1}|s, x) \int_{z_l} q(z_l|z_{l+1}) \log \frac{q(z_l|z_{l+1}, s, x)}{p(z_l|z_{l+1}, x)} dz_l, dz_{l+1}, \\ & = \sum_{l=1}^{L-1} \mathbb{E}_{q(z_{l+1}|s, x)} [KL[q(z_l|z_{l+1}, s, x)||p(z_l|z_{l+1}, x)]] \end{aligned} \quad (8)$$

Plugging the simplifications obtained in Eq.7 and Eq.8 into Eq.6 we obtain the expression for the evidence lower bound given in Eq.2.
